# Supplementary material for: Application of BiVO4–Microalgae Combined Treatment to Remove High Concentration Mixture of Sulfamethazine and Sulfadiazine
Source: MDPI journal article supplement (doi:10.3390/w14050718), 2022-02-24
Supplement: s1 [file s1]

Archive with 1 entries (1 files):
- water-1570982-supplementary.pdf
