# Supplementary material for: Application of BiVO4–Microalgae Combined Treatment to Remove High Concentration Mixture of Sulfamethazine and Sulfadiazine
Source: MDPI journal article supplement (doi:10.3390/w14050718), 2022-02-24
Supplement: s1 [file s1 › water-1570982-supplementary.pdf]

# Application of BiVO<sub>4</sub>–Microalgae Combined Treatment to Remove High Concentration Mixture of Sulfamethazine and Sulfadiazine

Wan Liu <sup>1</sup>, Shan Chen <sup>1,2</sup>, Han Zhou <sup>1</sup>, Xianyun Wang <sup>3</sup>, Houtao Xu <sup>4</sup>, Liqing Wang <sup>1</sup>, Wei Zhang <sup>1,\*</sup> and Lijing Chen <sup>1</sup>

## Supplementary Materials

### 1. Materials and methods

#### 1.1. Chemicals

**Table S1.** Physicochemical characteristics of the test pharmaceuticals.

| Compound | CAS No. | Molecular Structure                                                                  | Molecular Weight (g mol <sup>-1</sup> ) | Formula                                                         | pKa  | log K <sub>ow</sub> |
|----------|---------|--------------------------------------------------------------------------------------|-----------------------------------------|-----------------------------------------------------------------|------|---------------------|
| SD       | 68-35-9 | 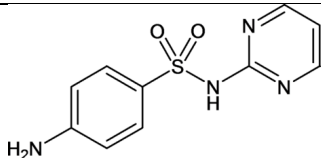  | 250.28                                  | C <sub>10</sub> H <sub>10</sub> N <sub>4</sub> O <sub>2</sub> S | 6.52 | -0.0314             |
| SM2      | 57-68-1 | 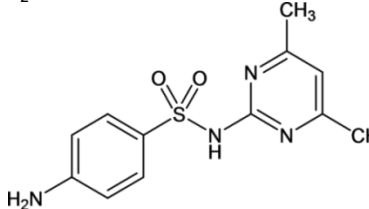 | 278.33                                  | C <sub>12</sub> H <sub>14</sub> N <sub>4</sub> O <sub>2</sub> S | 7.40 | 0.4687              |

### 2. Results and discussion

#### 2.1. Effect of algae on the removal of SAs under visible-light irradiation

The degradation rates observed for SM2 and SD via photolysis were 29.3 and 24.8%, respectively (Fig. S1). *Dictyosphaerium* sp. was able to remove 47.7% of SM2 and 28.6% of SD after 7 days of culture. It was found that *Dictyosphaerium* sp. can improve the removal of these two antibiotics. The  $\eta$  value of *Dictyosphaerium* sp. for SM2 was higher than that of SD. It is likely that *Dictyosphaerium* sp. has different sensitivity to different antibiotics. Previous studies have shown that *C. vulgaris* is more sensitive to SM2, followed by SD [1].

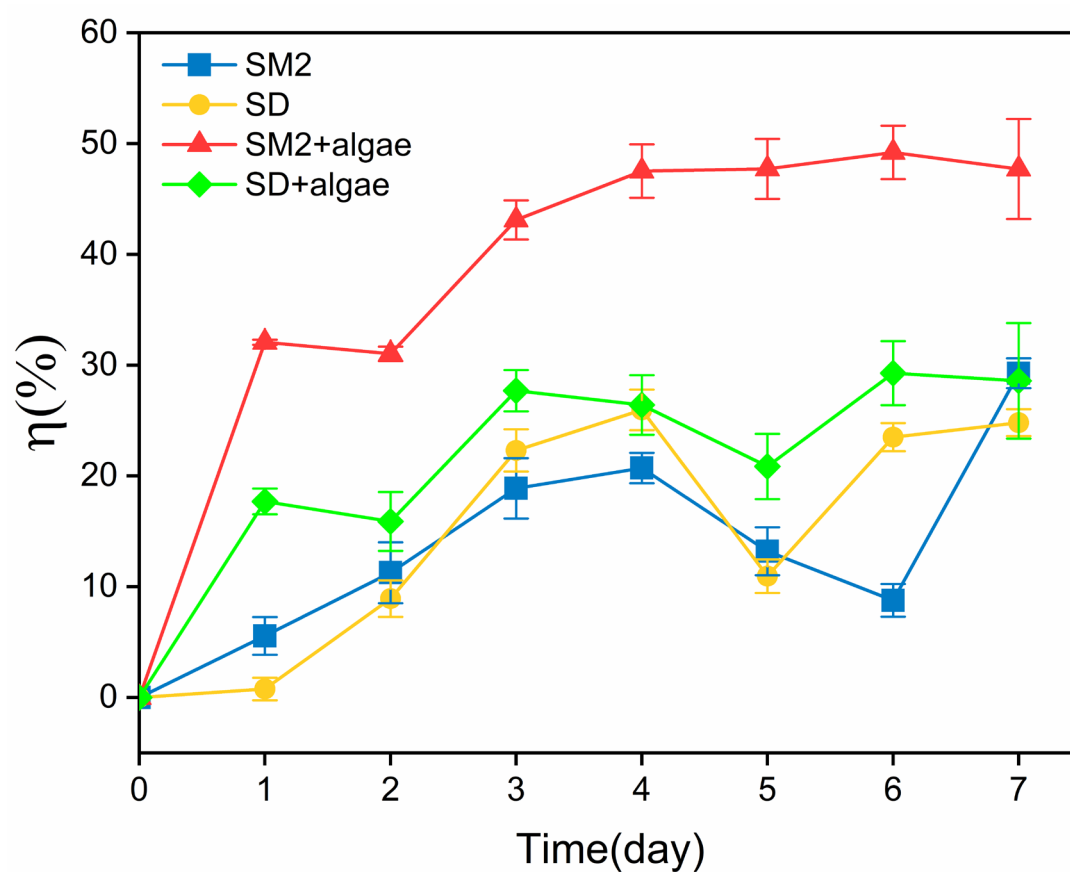

**Figure S1.** Effect of algae on the removal of SAs under vis-light irradiation.

## 2.2. Morphology and structure of $\text{BiVO}_4$

The TEM image of the as-prepared sample showed that  $\text{BiVO}_4$  exists in the form of microspheres with a lattice fringe width of 0.228 nm.

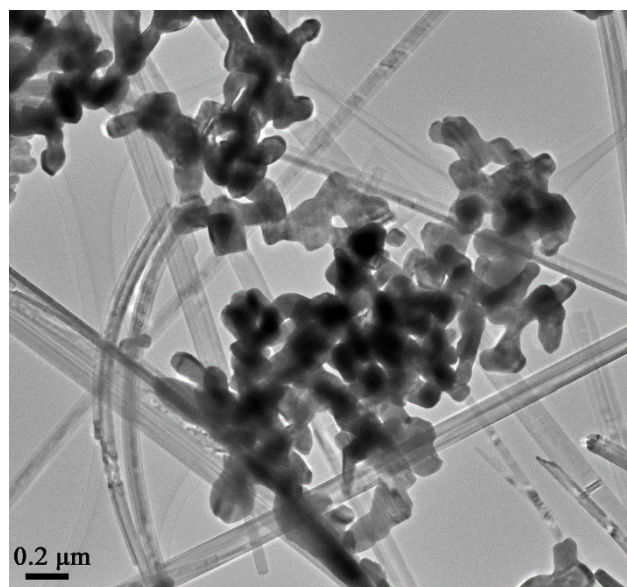

**Figure S2.** TEM image of  $\text{BiVO}_4$ .

## References

1. Kurade, M.B.; Kim, J.R.; Govindwar, S.P.; Jeon, B.-H. Insights into microalgae mediated biodegradation of diazinon by *Chlorella vulgaris*: Microalgal tolerance to xenobiotic pollutants and metabolism. *Algal. Res.* **2016**, *20*, 126-134.
